# Supplementary material for: Discovery of dual fluorescent 1,8-naphthalimide dyes based on balanced seesaw photophysical model
Source: Royal Society of Chemistry journal article supplement (doi:10.1039/b911768g), 2009-01-01
Supplement: nmrdata1a.pdf [file nmrdata1a.pdf]

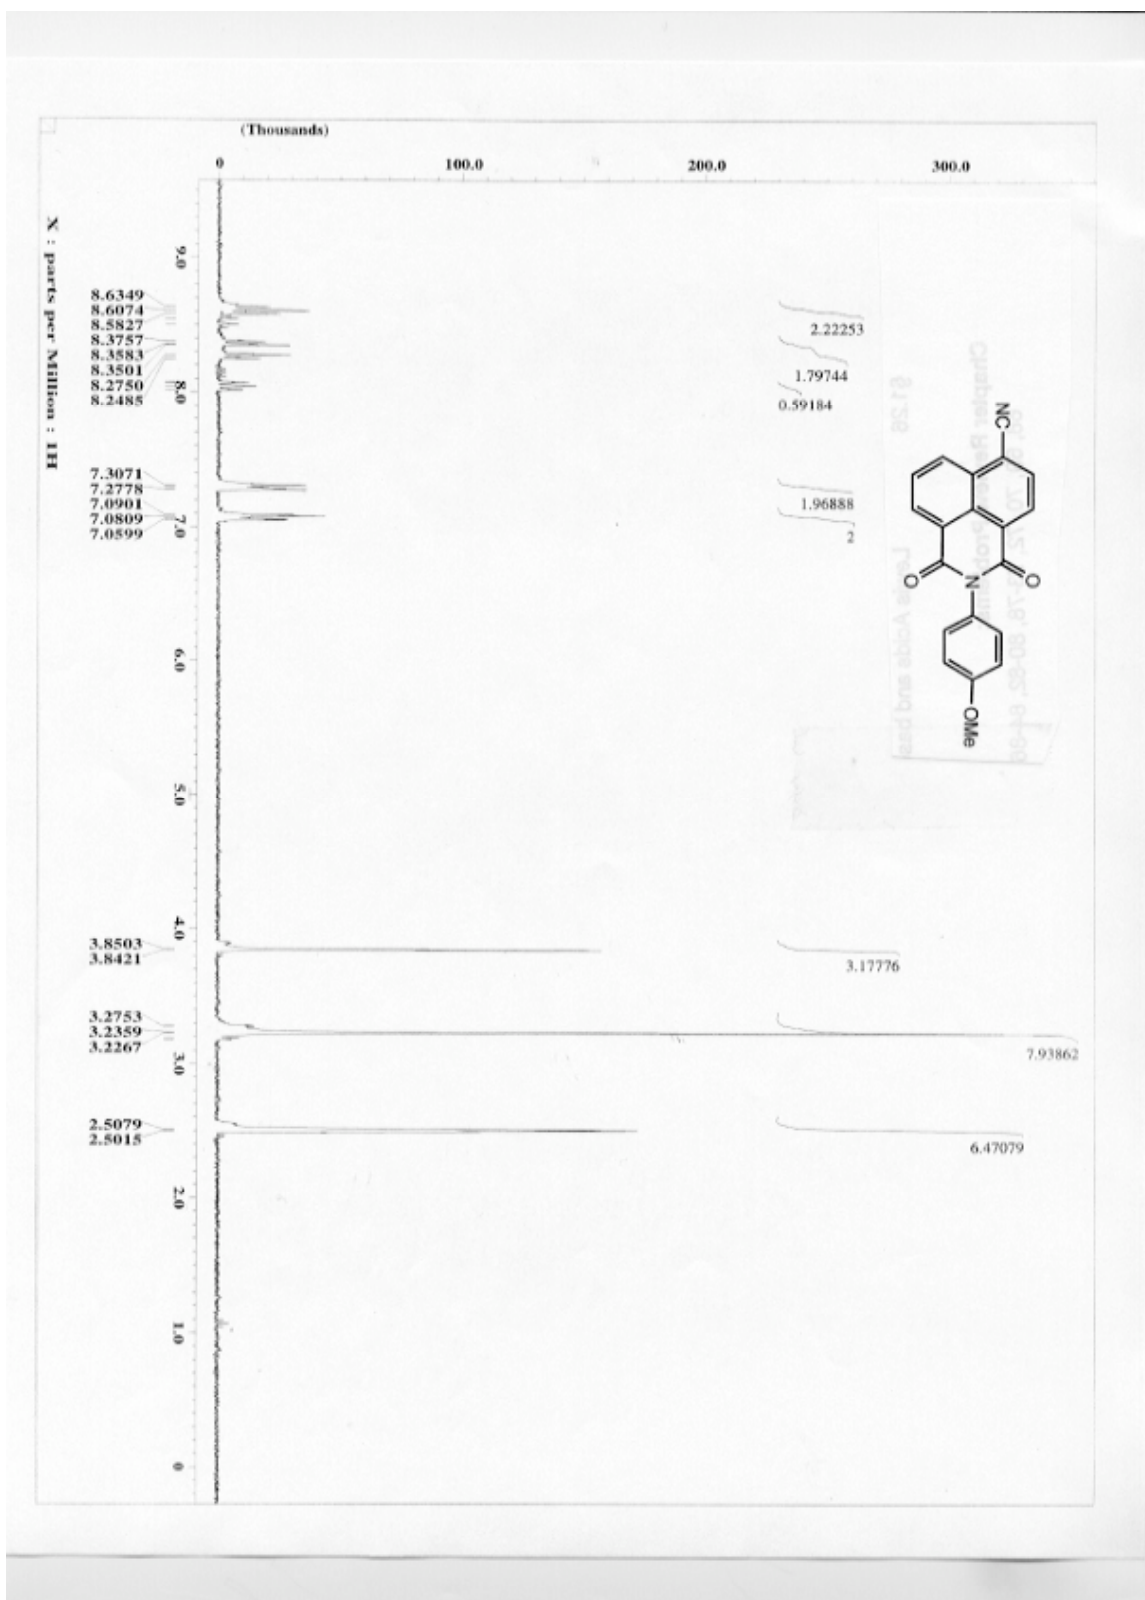

$^1\text{H}$  NMR for 4-methoxyphenyl-4'-cyano-1,8-NI (**1**)

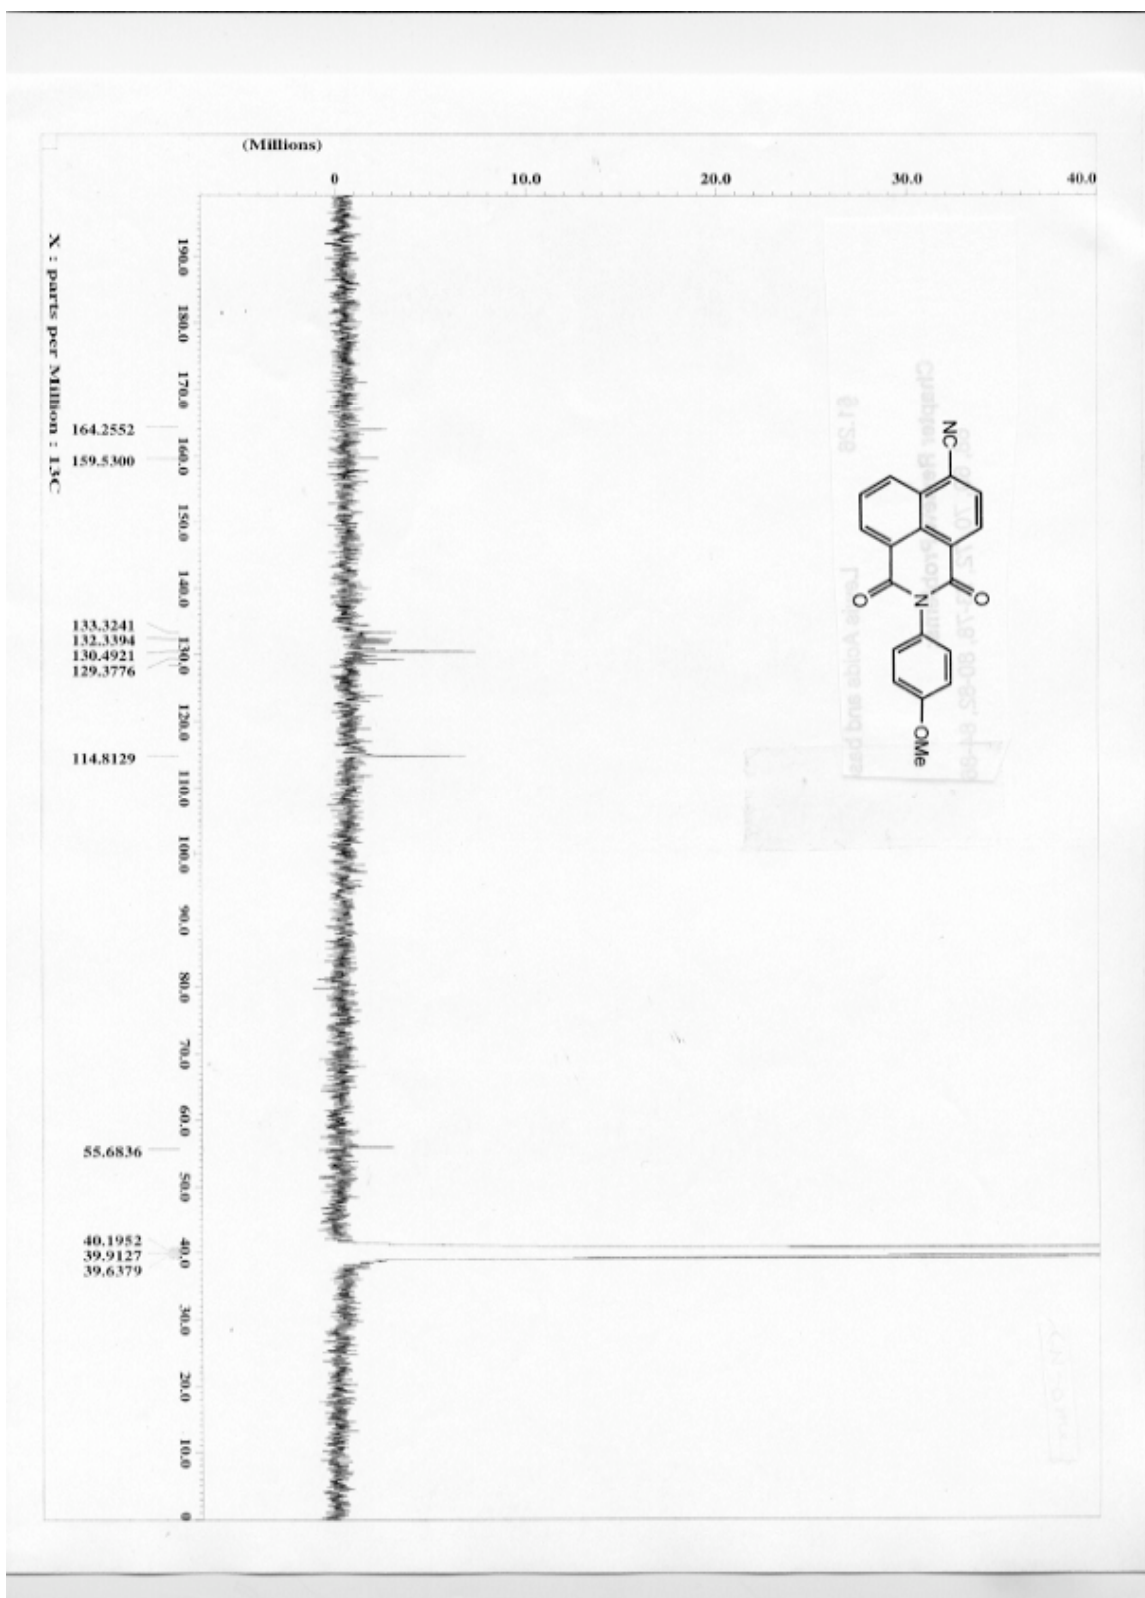

13C NMR for 4-methoxyphenyl-4'-cyano-1,8-NI (1)

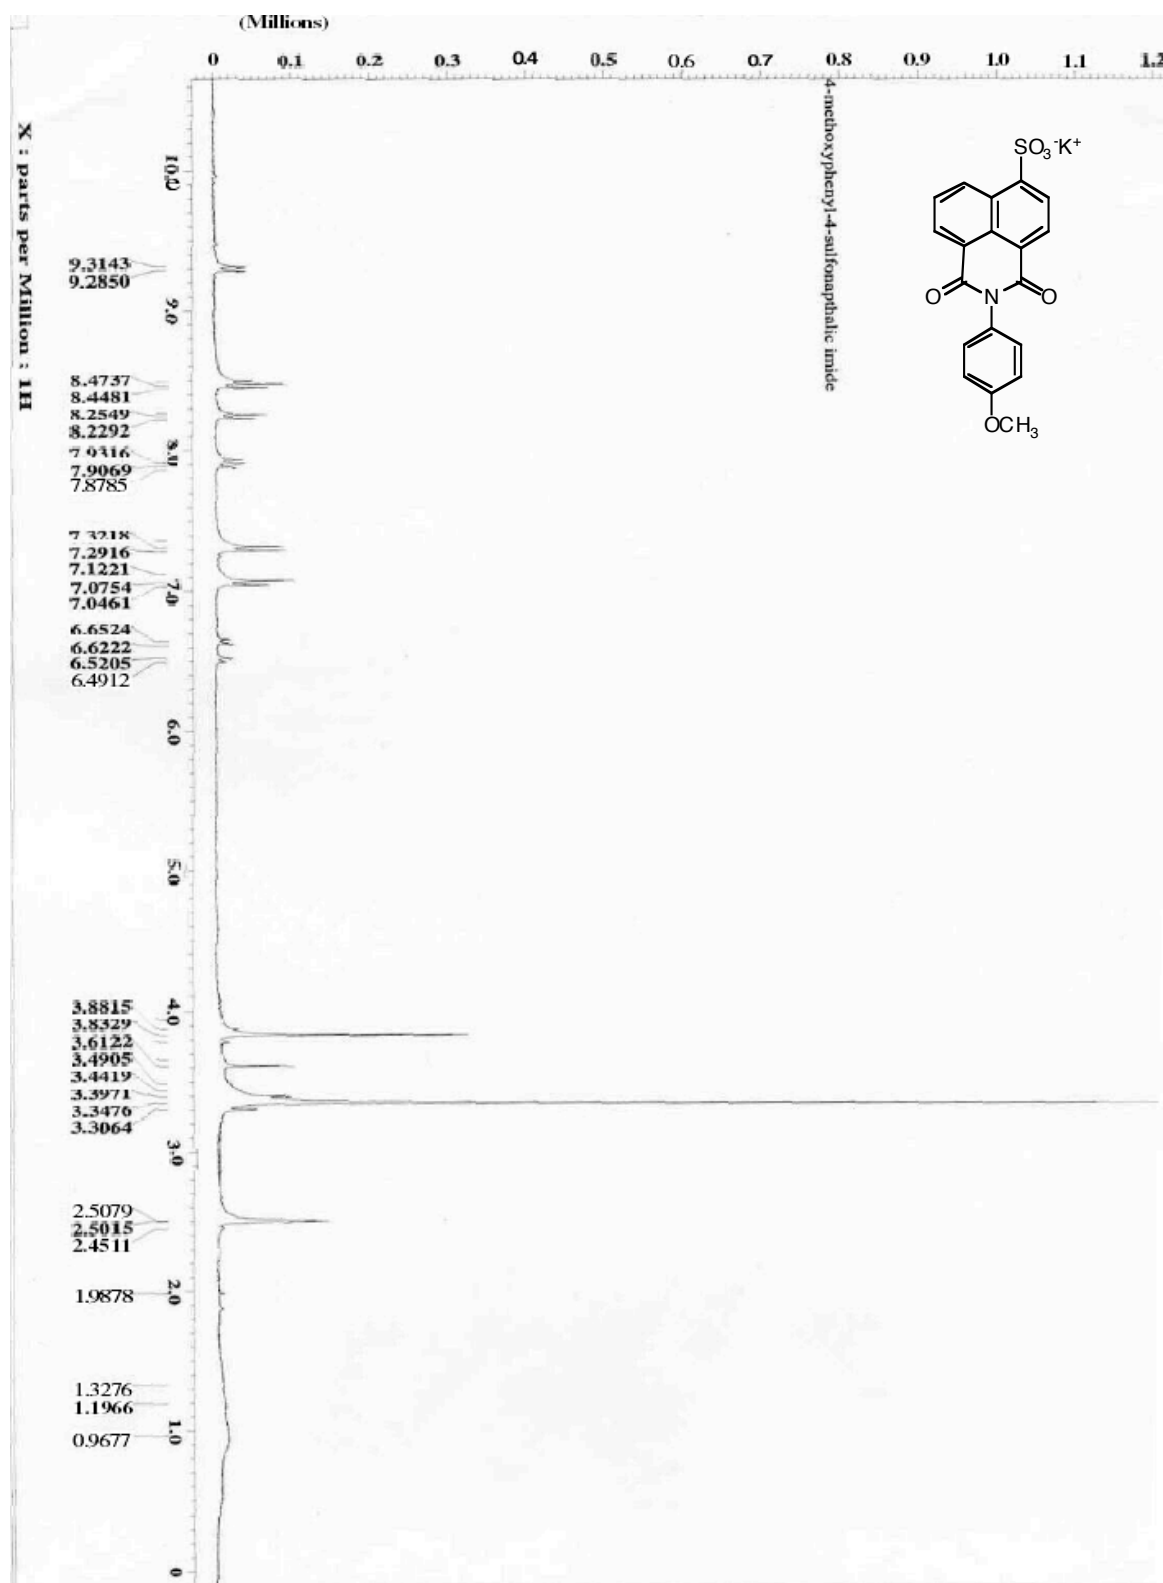

<sup>1</sup>H NMR for 4-methoxyphenyl-4'-sulfo-1,8-NI (2)

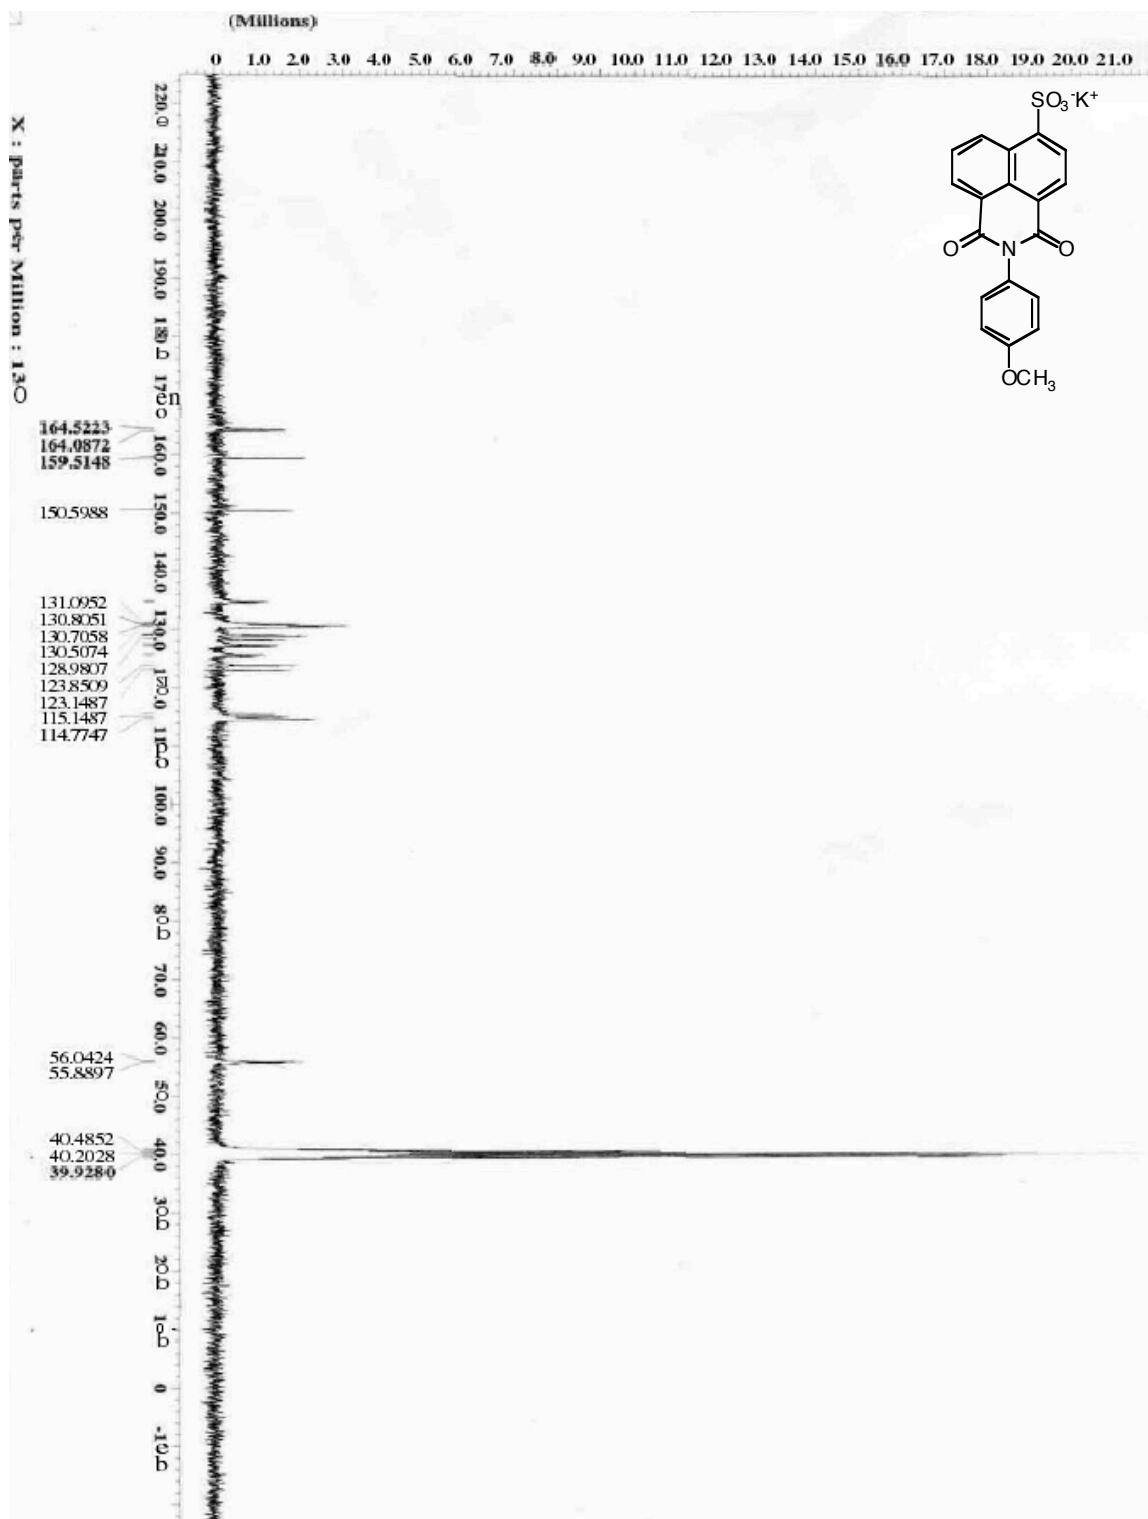

<sup>13</sup>C NMR for 4-methoxyphenyl-4'-sulfo-1,8-NI (2)

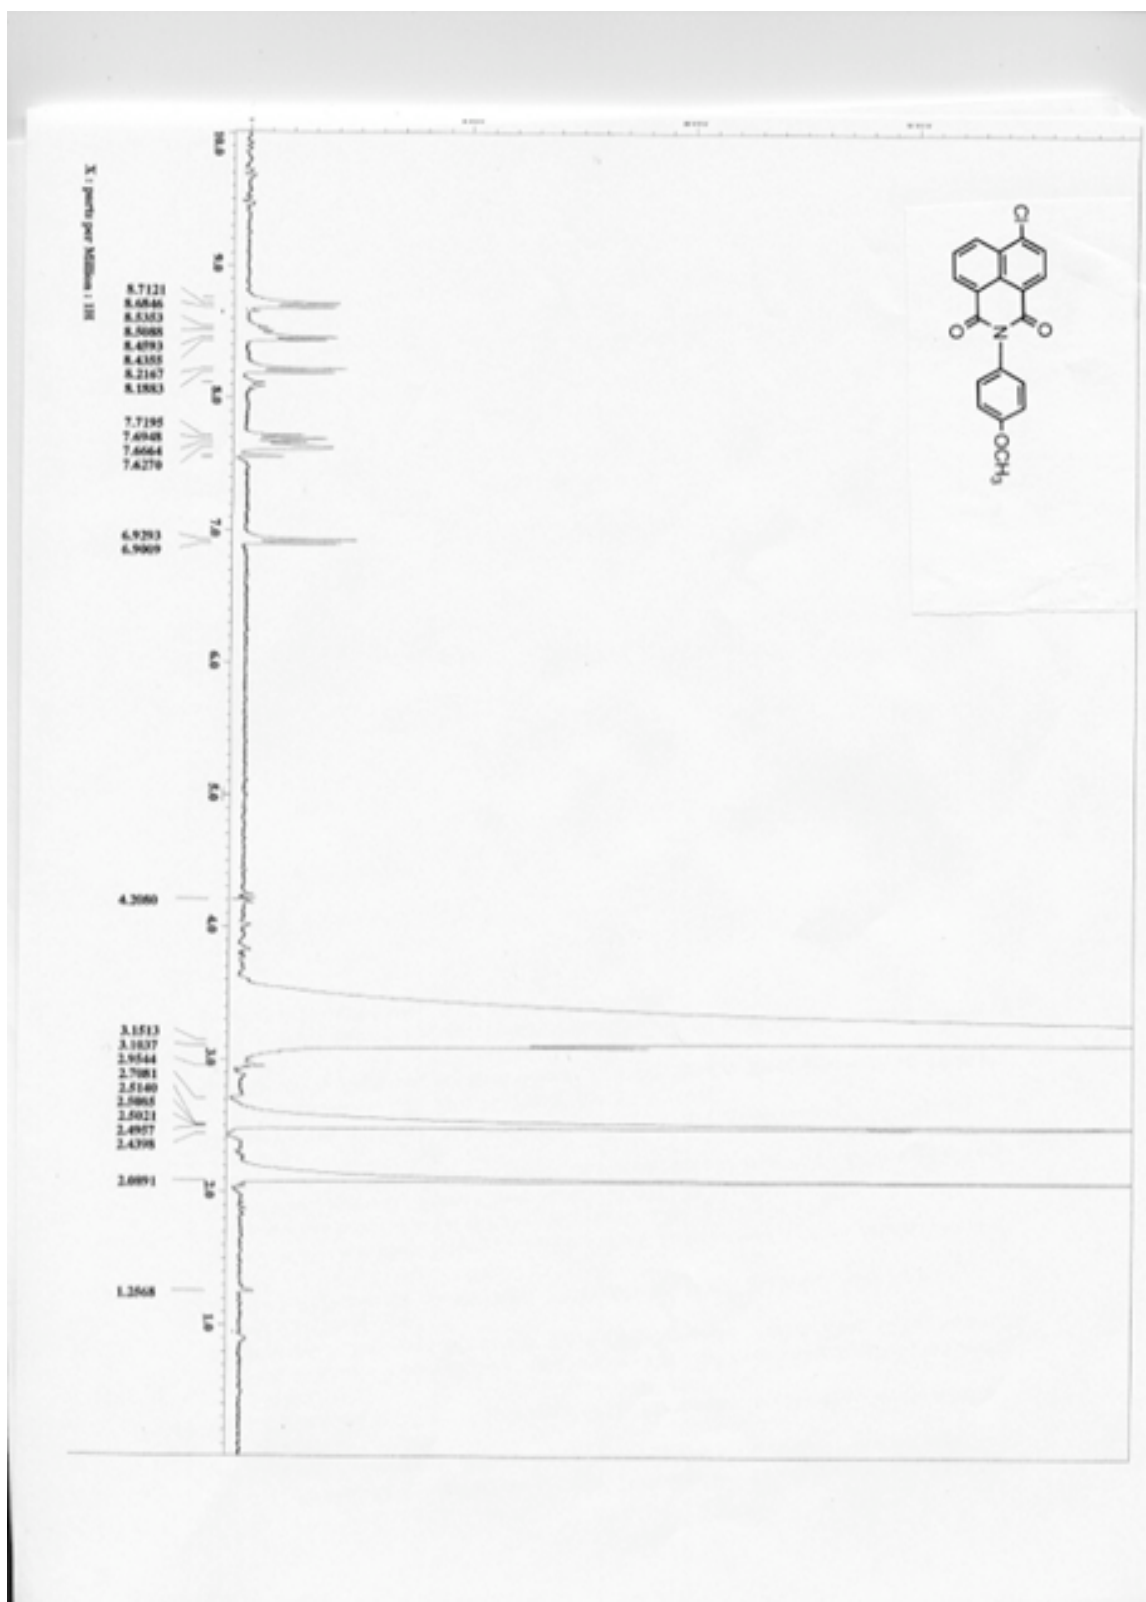

<sup>1</sup>H NMR for 4-methoxyphenyl-4'-chloro-1,8-NI (**3**)



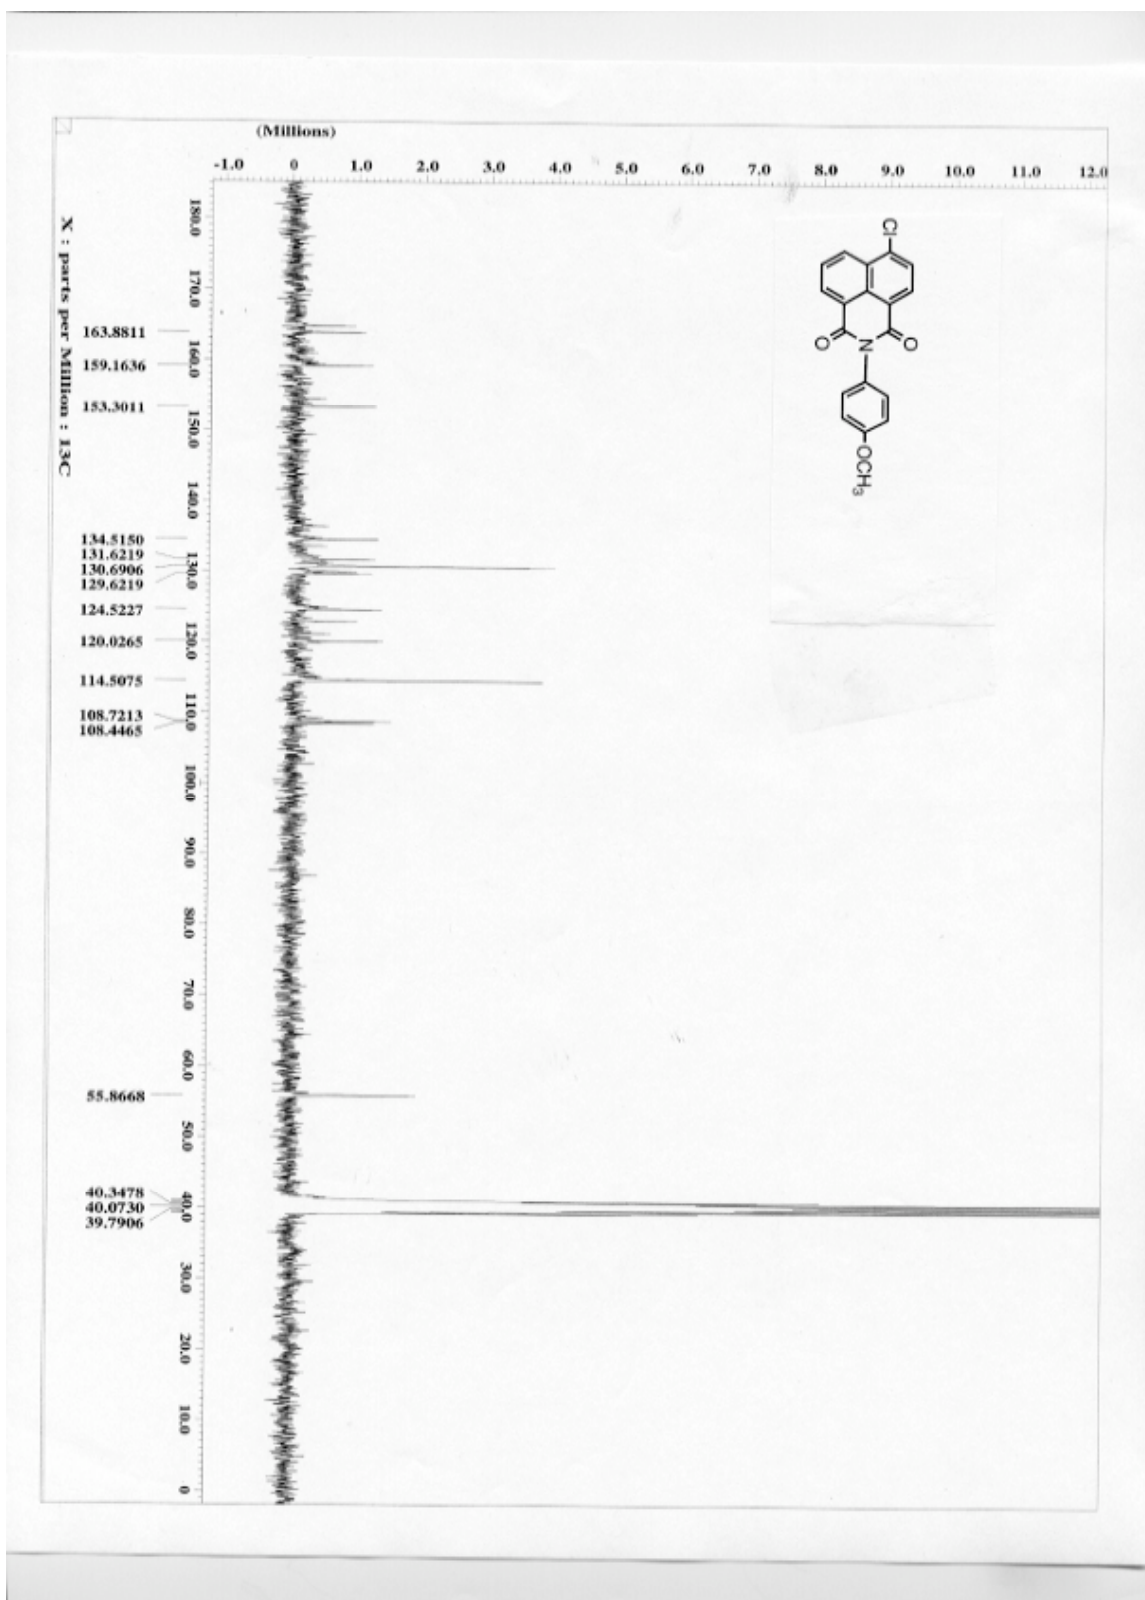

<sup>13</sup>C NMR for 4-methoxyphenyl-4'-chloro-1,8-NI (3)

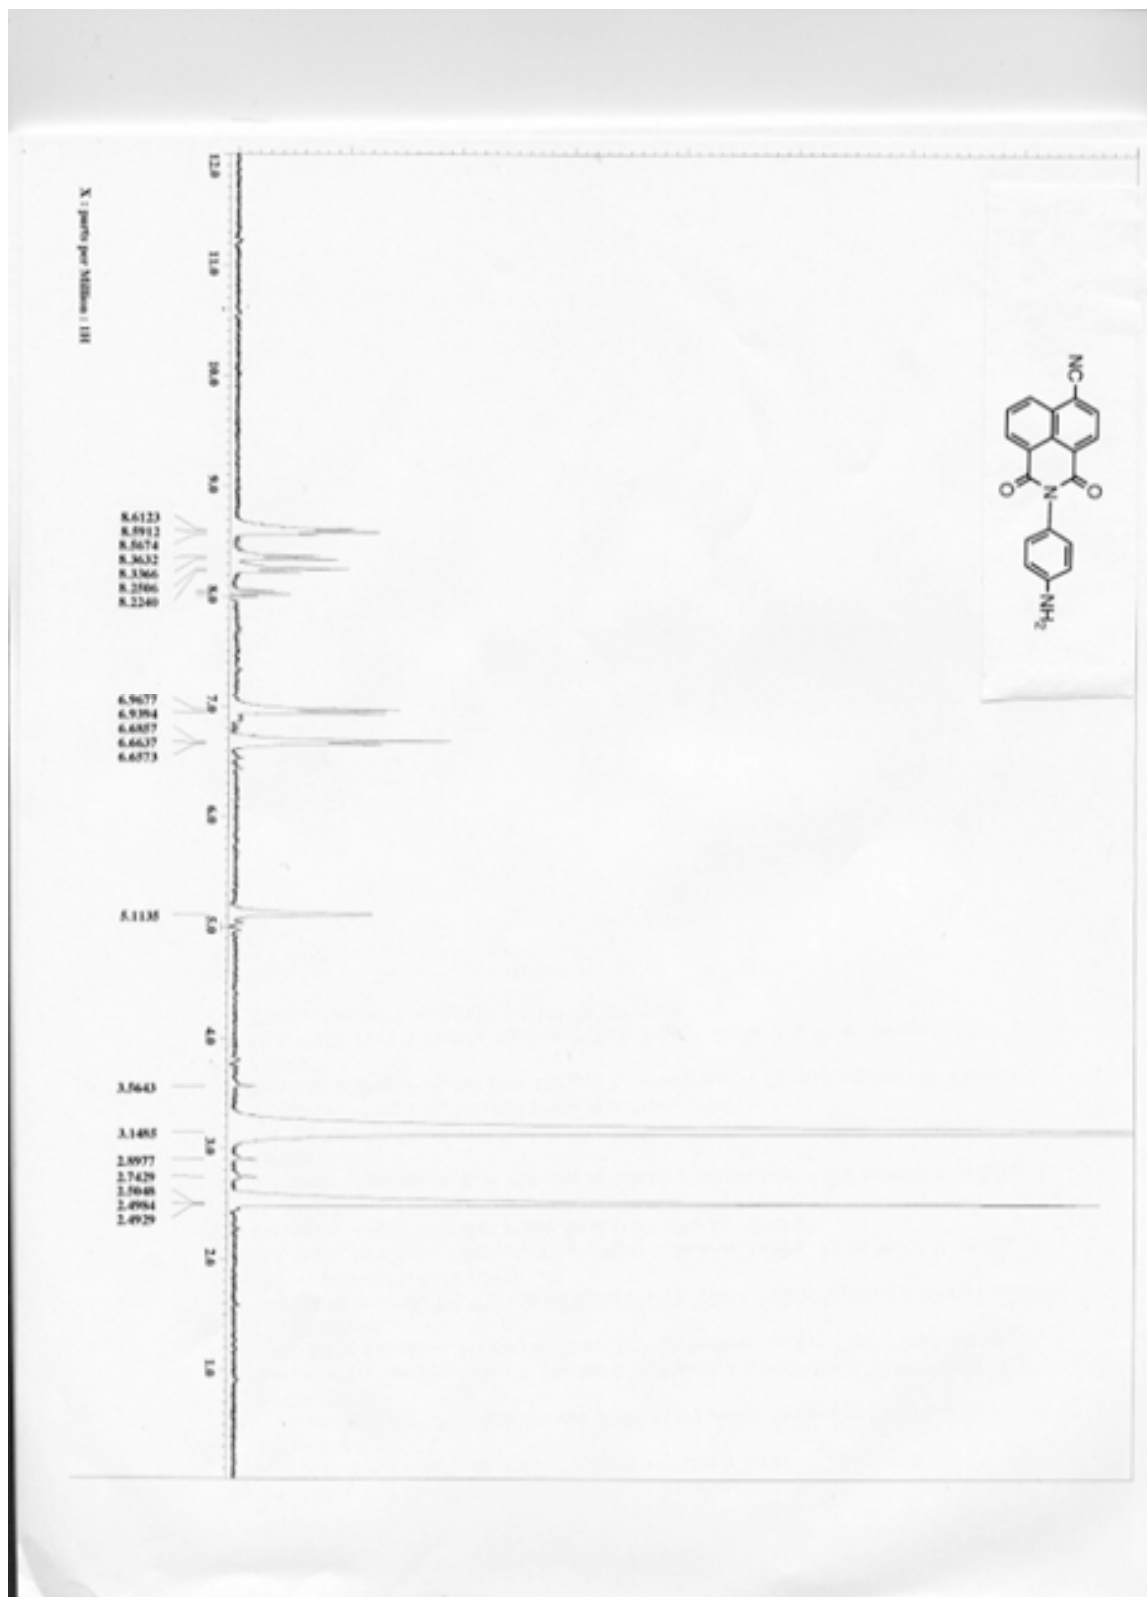

<sup>1</sup>H NMR for 4-aminophenyl-4'-cyano-1,8-NI (4)

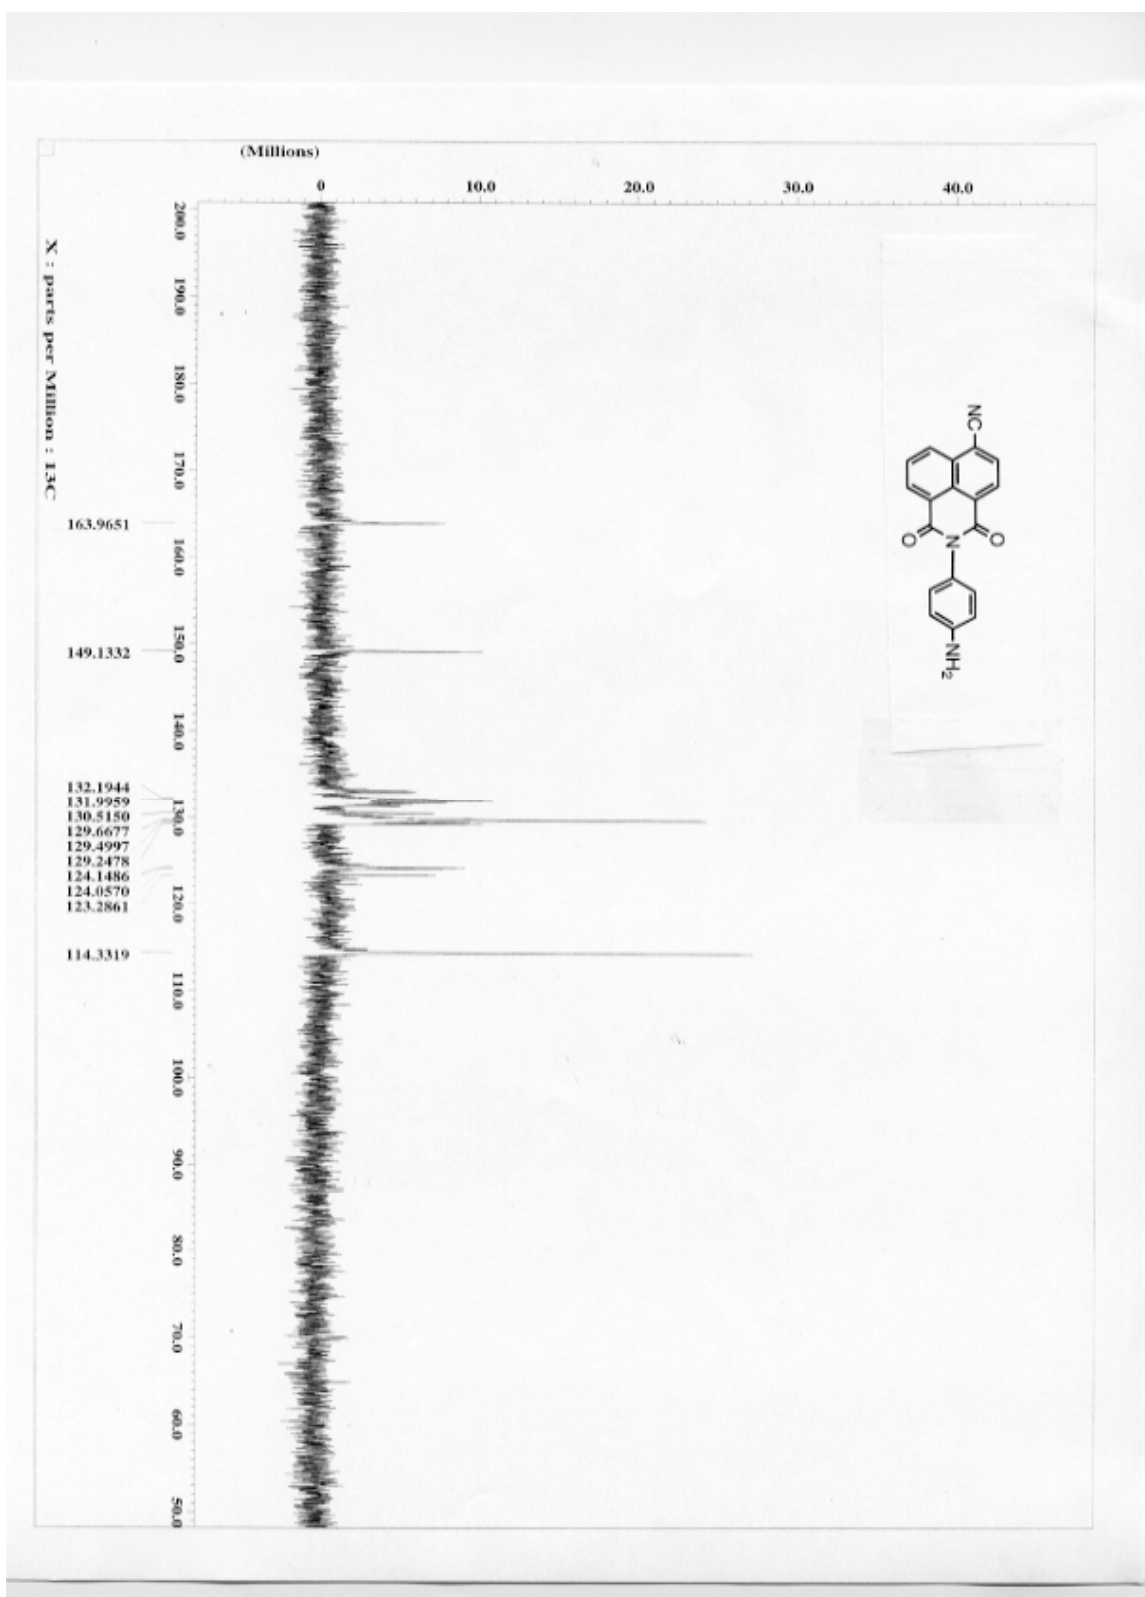

<sup>13</sup>C NMR for 4-methoxyphenyl-4'-sulfo-1,8-NI (4)



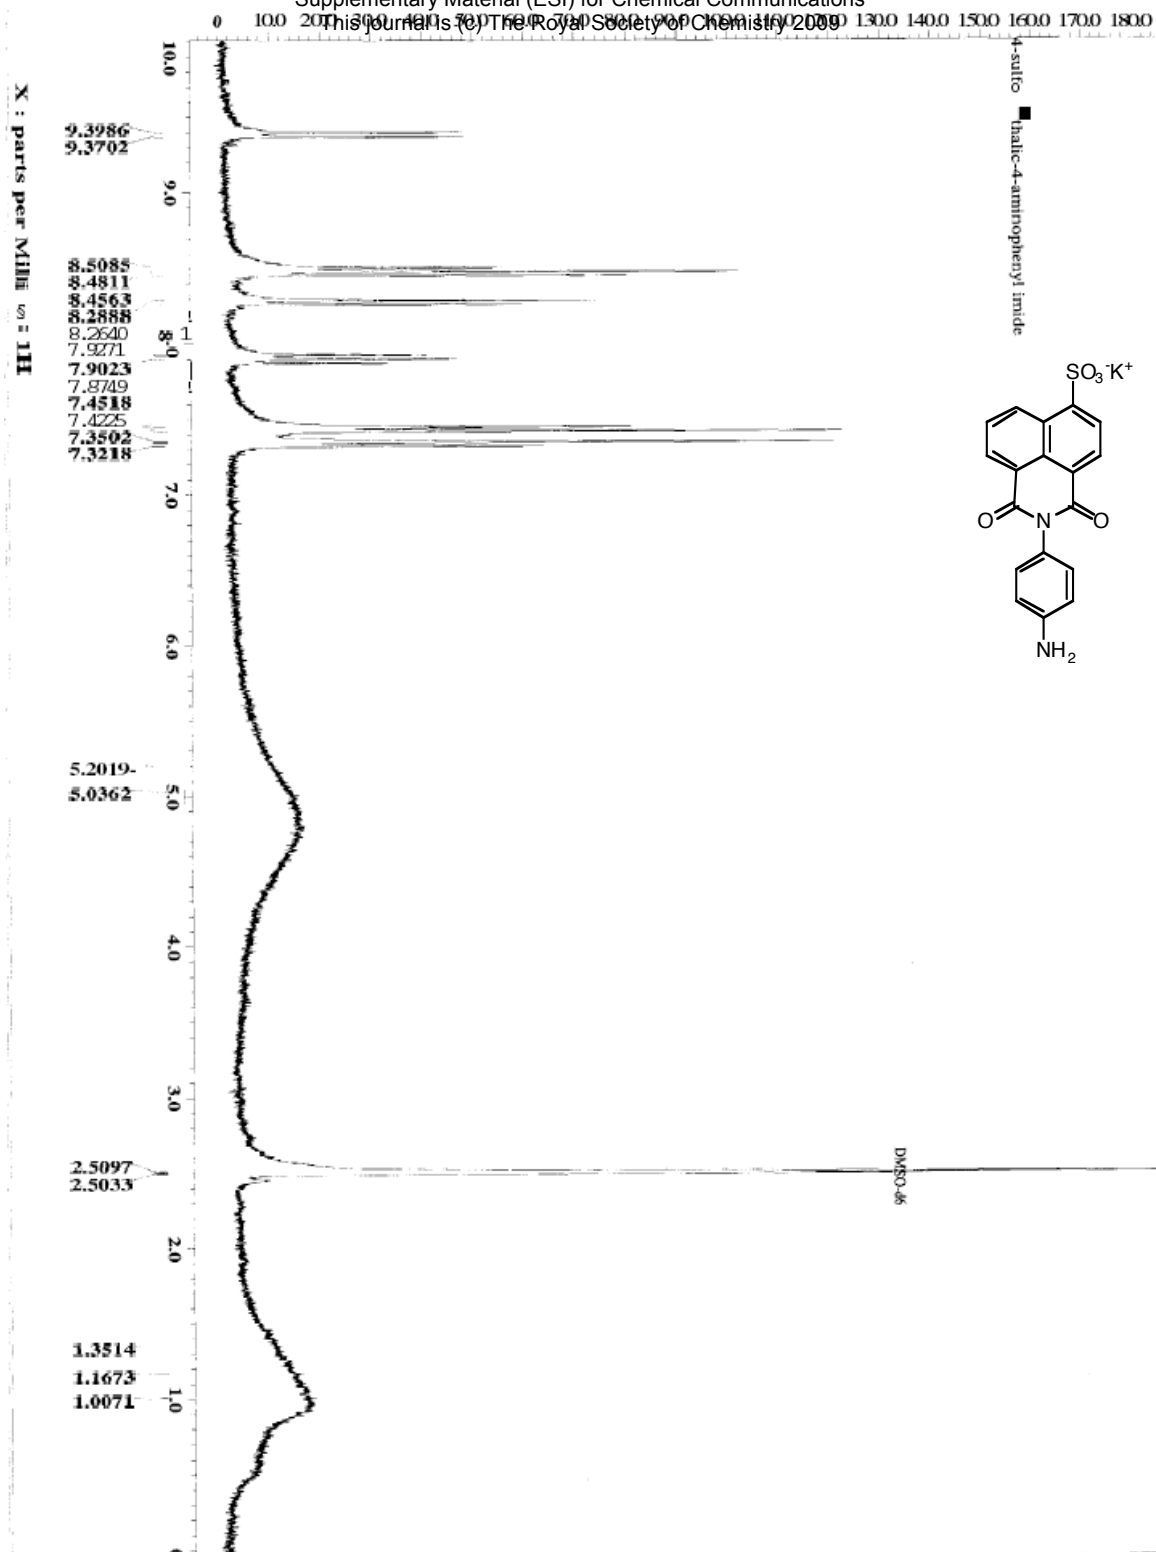

<sup>13</sup>C NMR for 4-aminophenyl-4'-sulfo-1,8-NI (**5**)

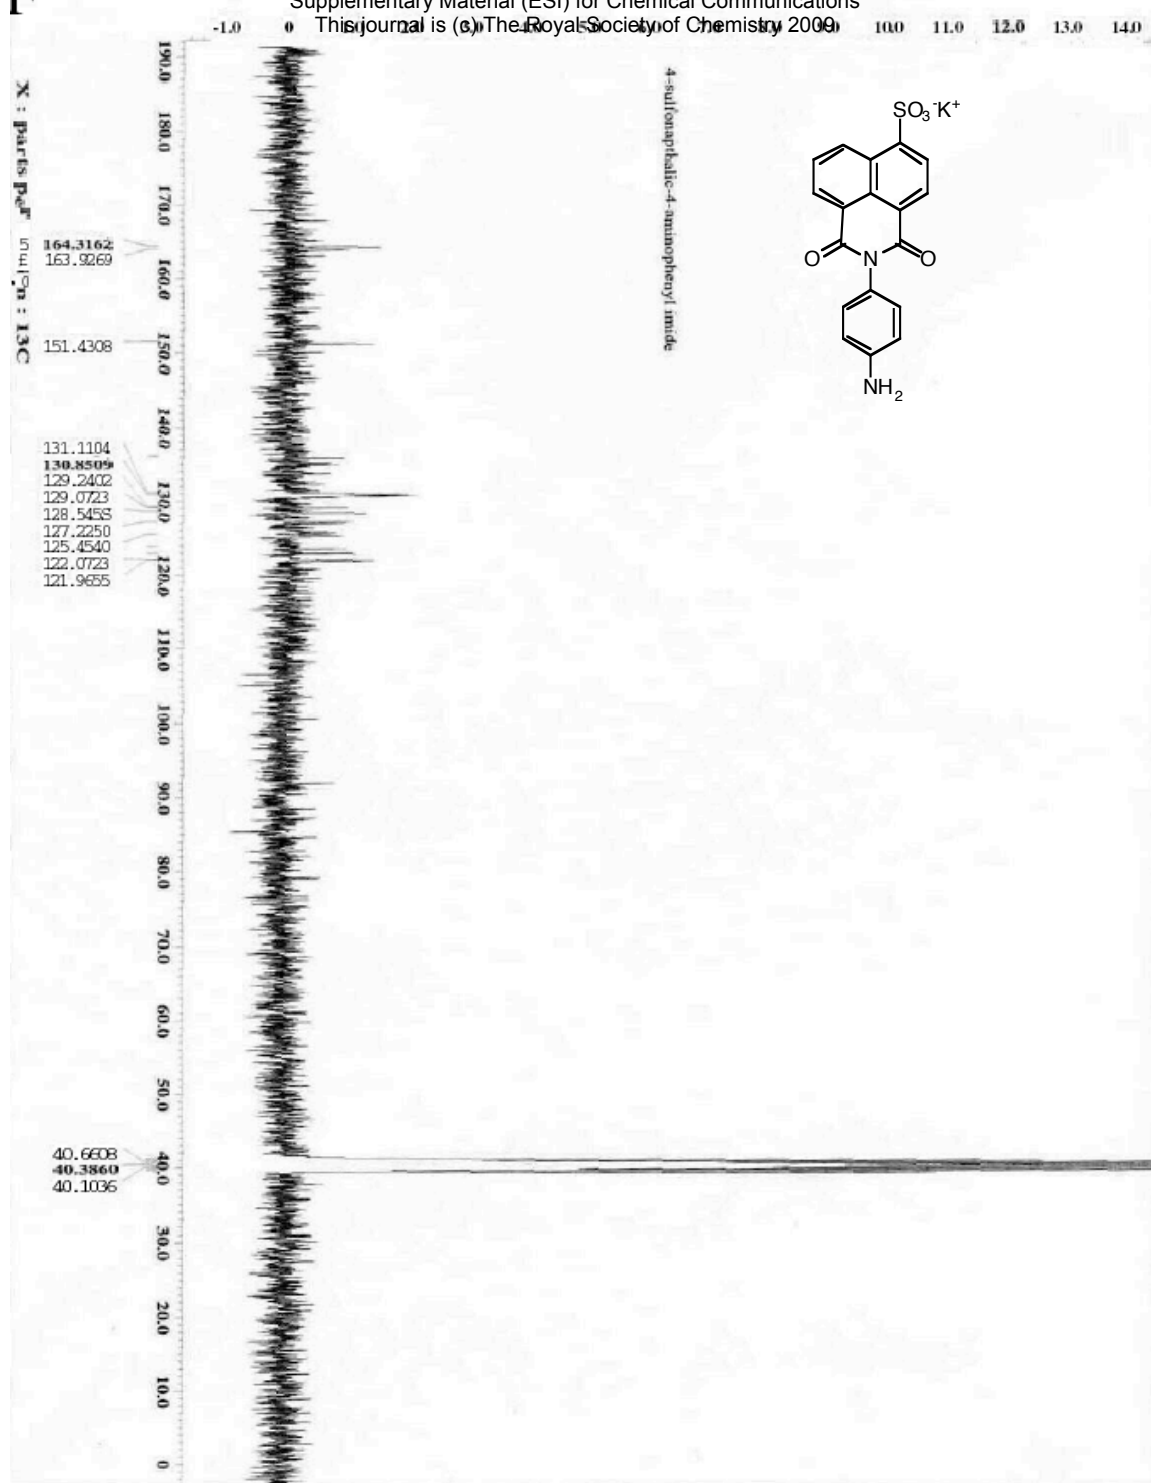

$^{13}\text{C}$  NMR for 4-aminophenyl-4'-sulfo-1,8-NI (**5**)

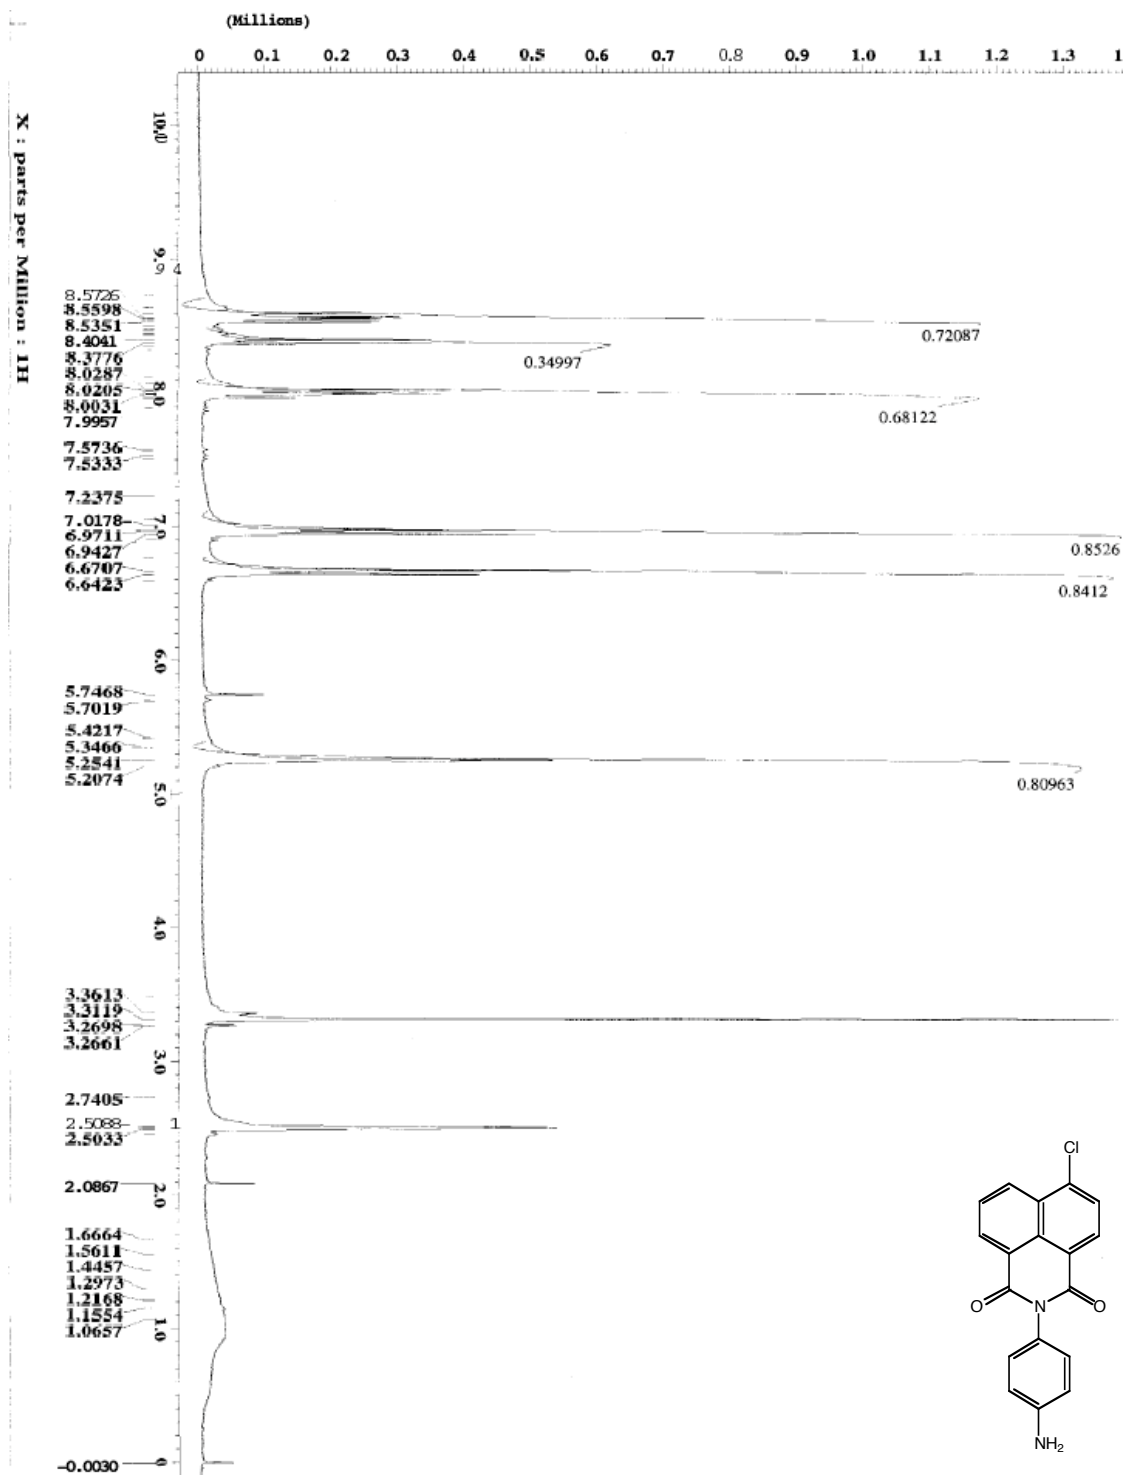

1H NMR for 4-aminophenyl-4'-chloro-1,8-NI (6)

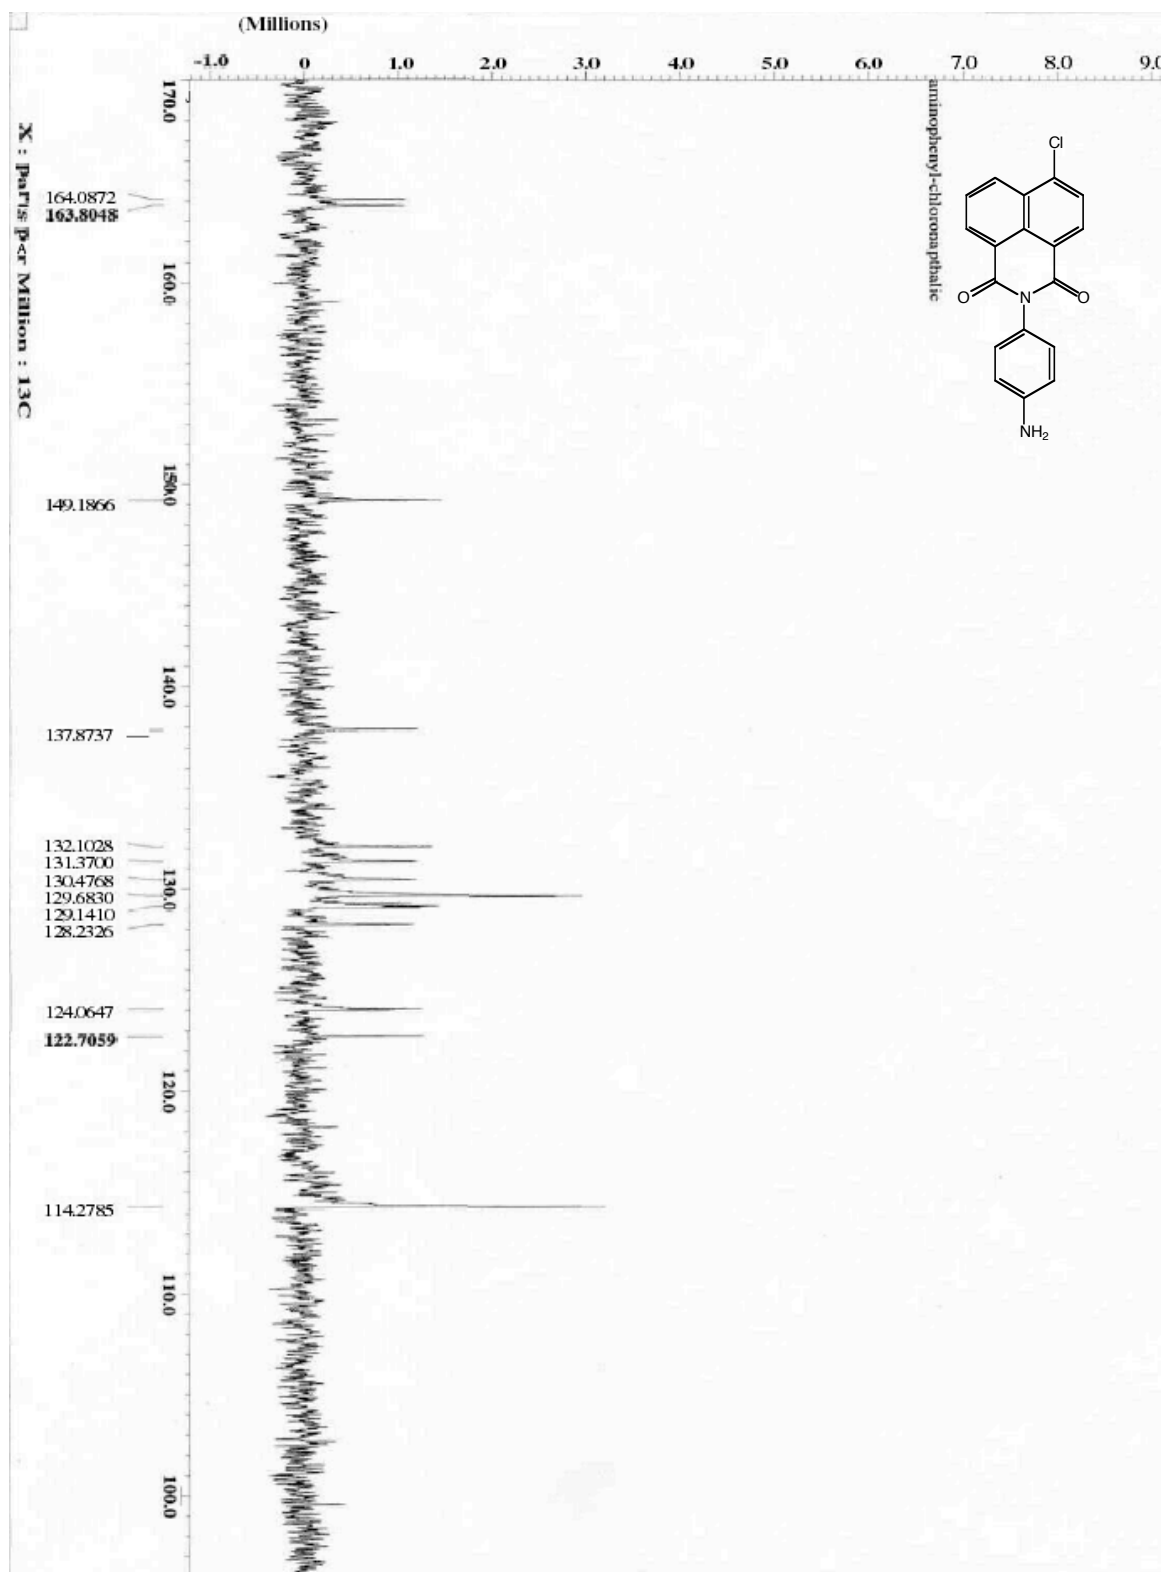

<sup>13</sup>C NMR for 4-aminophenyl-4'-chloro-1,8-NI (**6**)

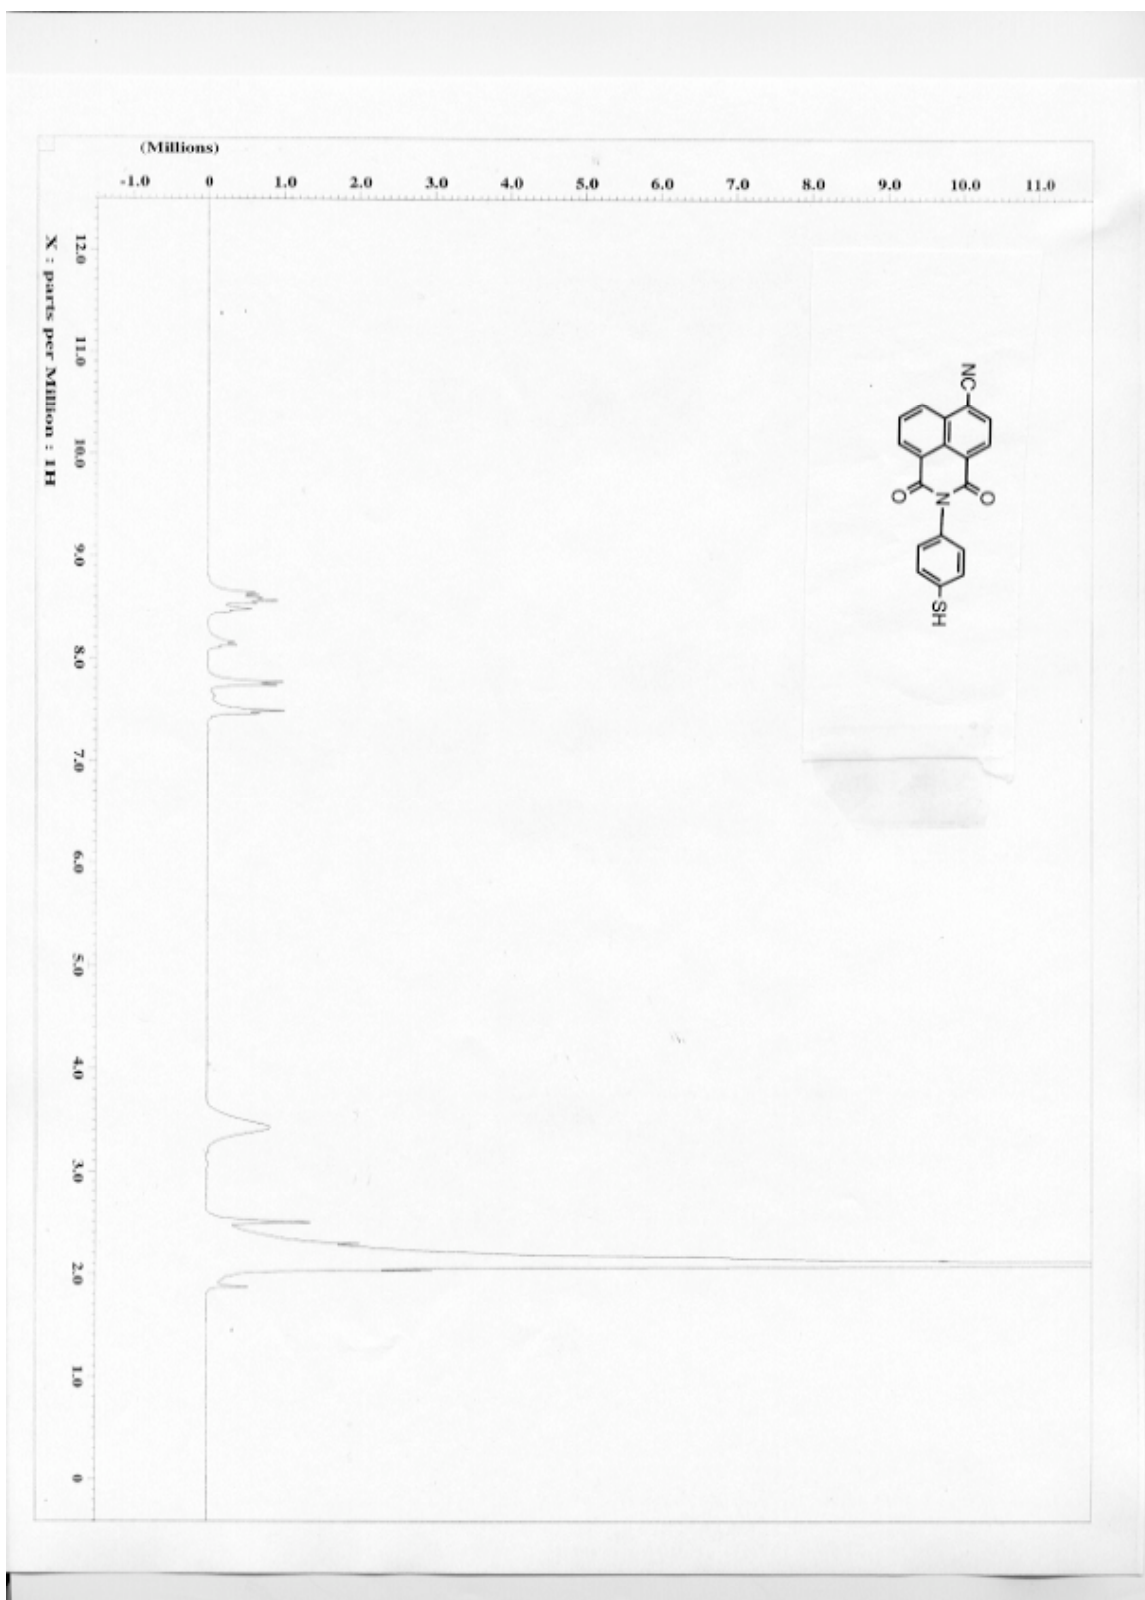

<sup>1</sup>H NMR for 4-thiophenyl-4'-cyano-1,8-NI (7)



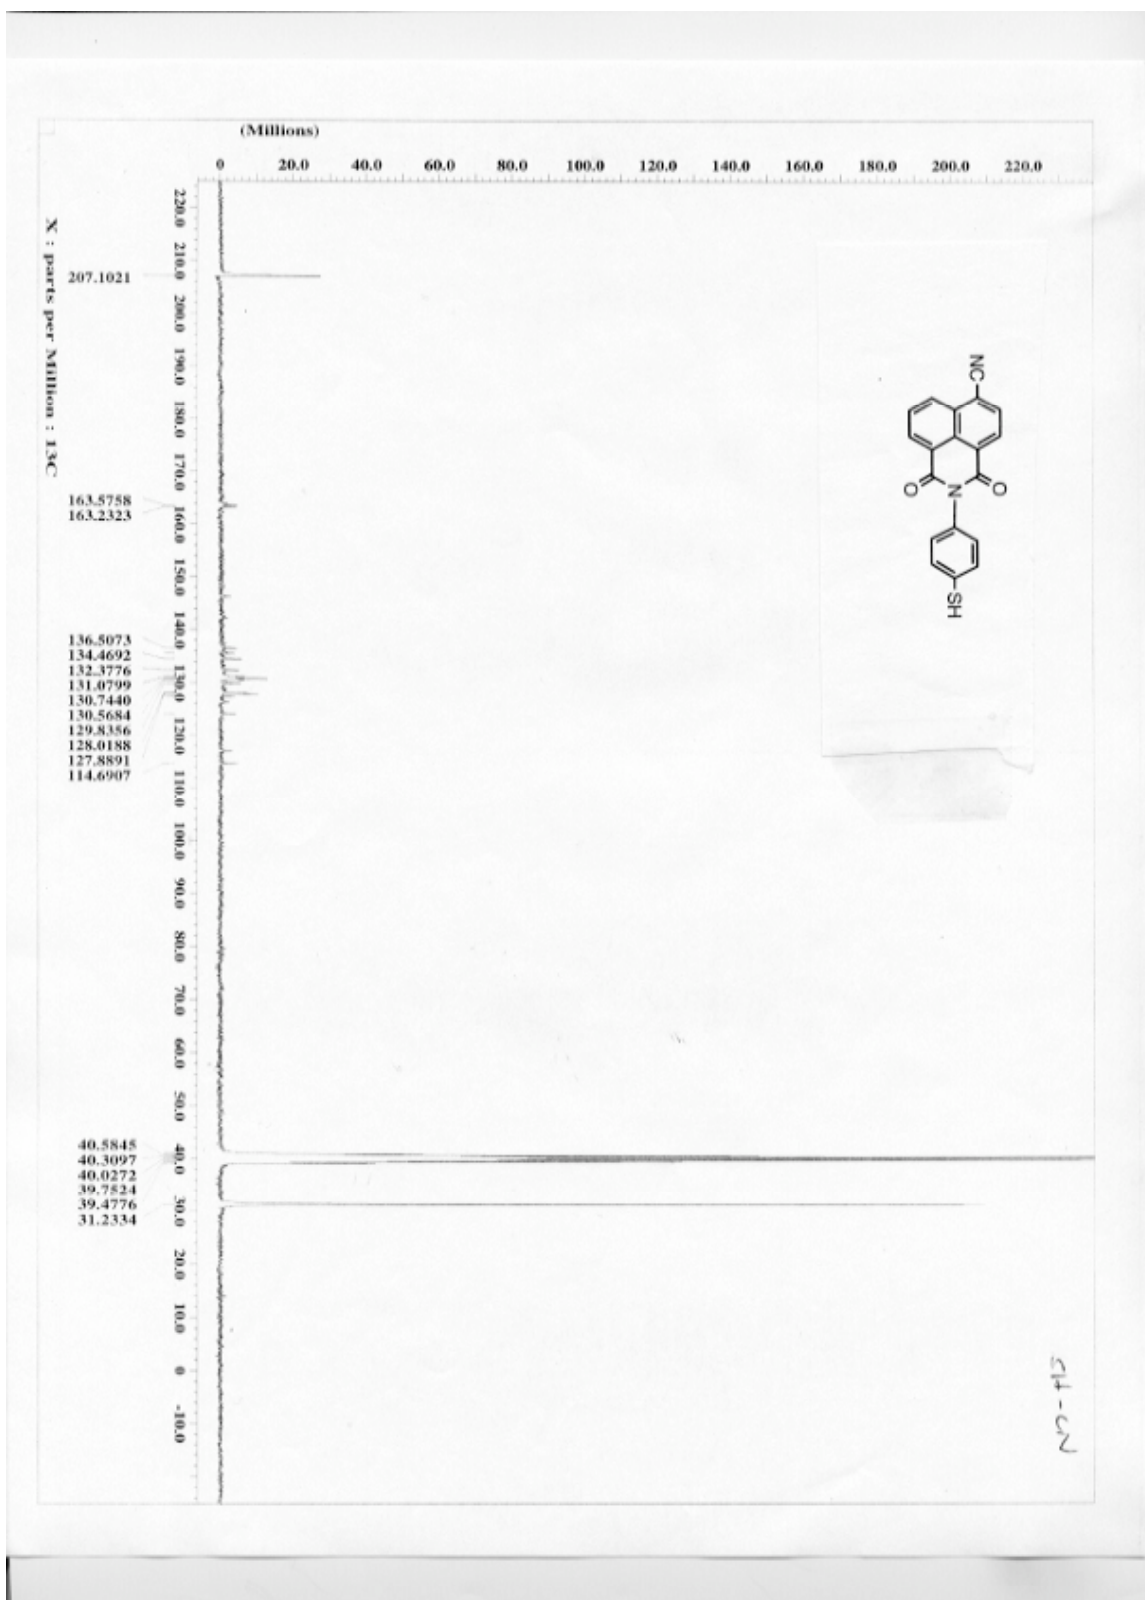

$^{13}\text{C}$  NMR for 4-thiophenyl-4'-cyano-1,8-NI (**7**)

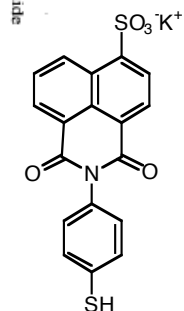

<sup>1</sup>H NMR for 4-thiophenyl-4'-sulfo-1,8-NI (**8**)

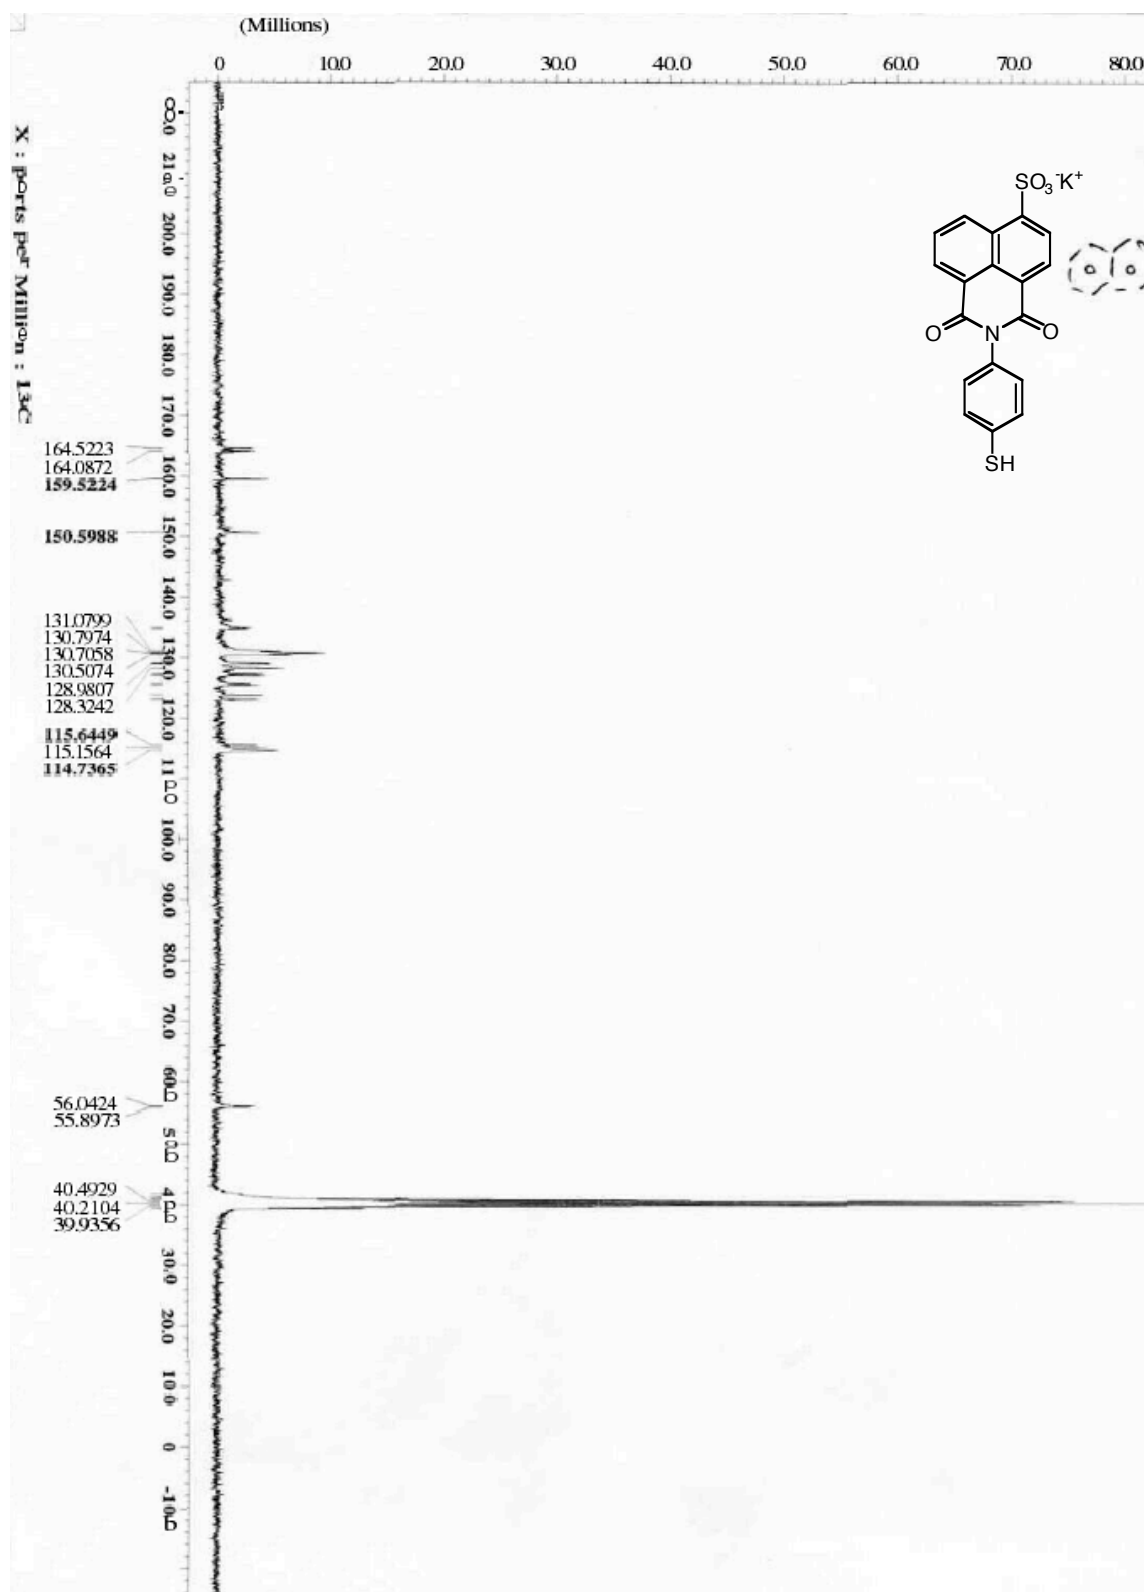

$^{13}\text{C}$  NMR for 4-thiophenyl-4'-cyano-1,8-NI (**8**)
