# Supplementary figures and images for: Discovery of dual fluorescent 1,8-naphthalimide dyes based on balanced seesaw photophysical model
Source: Royal Society of Chemistry journal article supplement (doi:10.1039/b911768g), 2009-01-01

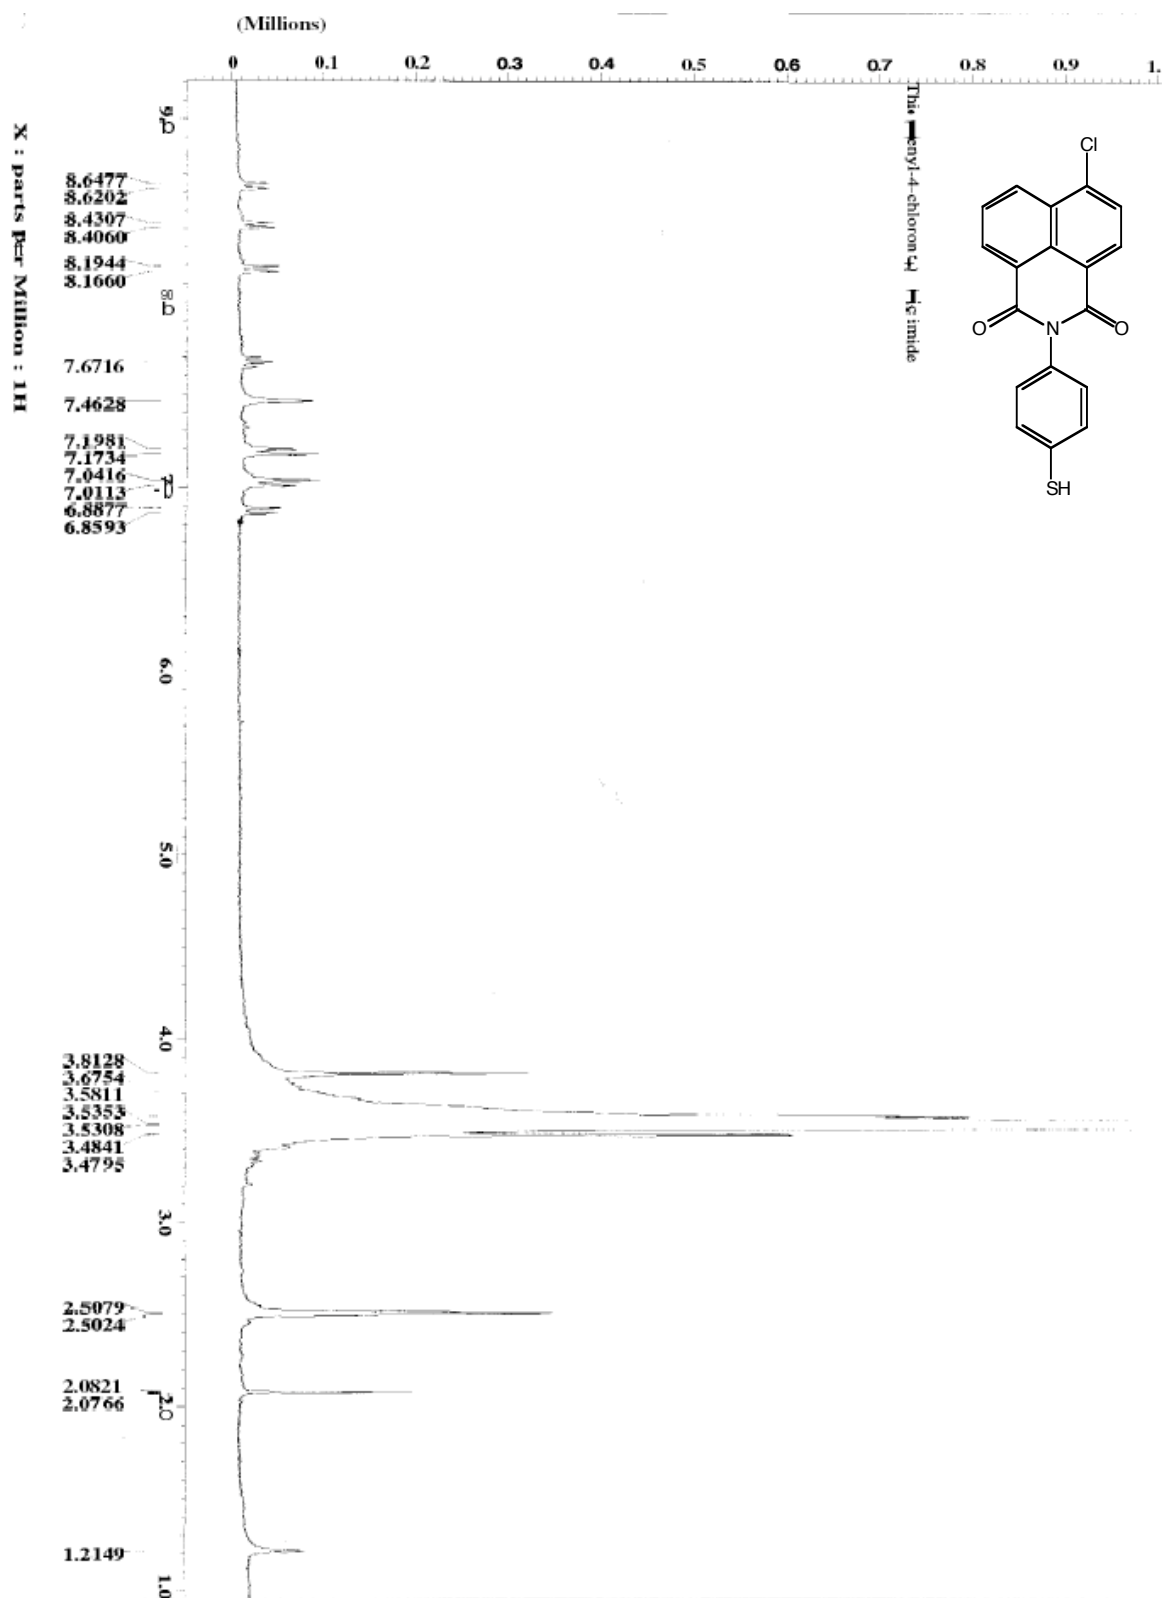

<sup>1</sup>H NMR for 4-thiophenyl-1,8-NI (9)

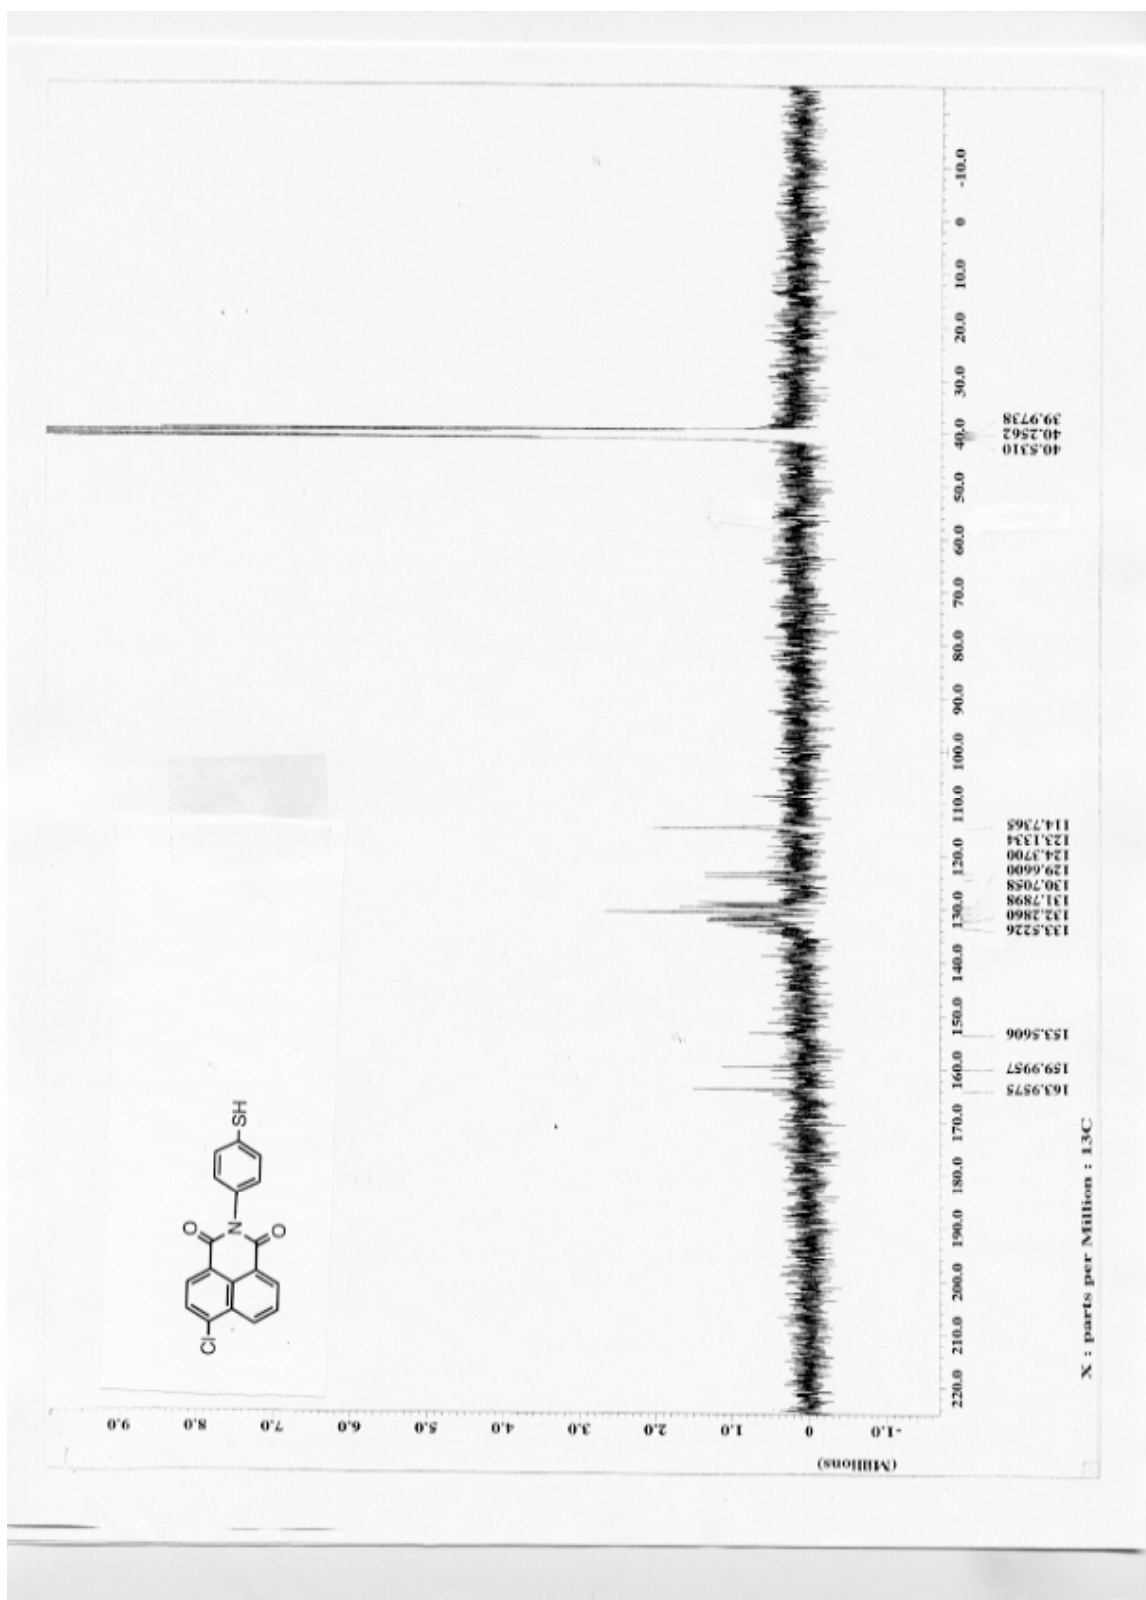

<sup>13</sup>C NMR for 4-thiophenyl-1,8-NI (9)

Supplement: nmrdata2a.pdf [file nmrdata2a.pdf]
